# Supplementary material for: The Combination of MoS2/WO3 and Its Adsorption Properties of Methylene Blue at Low Temperatures
Source: MDPI journal article supplement (doi:10.3390/molecules25010002), 2019-12-18
Supplement: s1 [file s1]

**Supplementary Materials:** The following are available online. The value of Zeta potential were measured by a ZETA SIZER nano series (Nano-ZS90).

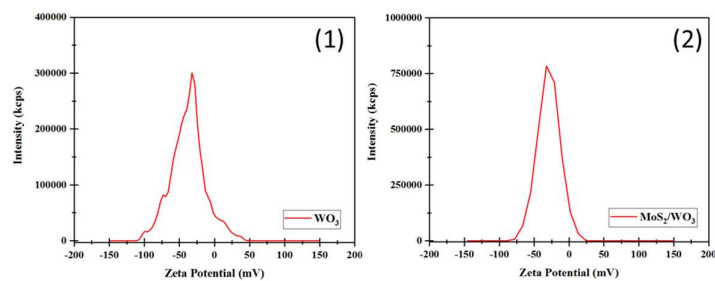

Figure S1. The Zeta potential of  $\text{WO}_3$  (1) and  $\text{MoS}_2/\text{WO}_3$  (2).
